# Supplementary material for: Genetically defined individual reference ranges for tryptase limit unnecessary procedures and unmask myeloid neoplasms
Source: PubMed Central journal article supplement — Blood Adv. 2022 Oct 1;7(9):1796–810. doi: 10.1182/bloodadvances.2022007936 (PMC10164828; doi:10.1182/bloodadvances.2022007936), 2022-10-01
Supplement: BLOODA_ADV-2022-007936-mmc1.pdf [file BLOODA_ADV-2022-007936-mmc1.pdf]

## Supplementary Appendix

Supplement to: Chovanec et al. **Genetically determining individualized clinical reference ranges for the biomarker tryptase can limit unnecessary procedures and unmask myeloid neoplasms**

### Table of Contents:

|                                                                                                                                                |           |
|------------------------------------------------------------------------------------------------------------------------------------------------|-----------|
| <b>Supplemental Methods</b> .....                                                                                                              | <b>2</b>  |
| <b>Fig. S1.</b> Alignment of the tryptase locus in hereditary alpha tryptasemia.....                                                           | <b>3</b>  |
| <b>Fig. S2.</b> Gel electrophoresis of alpha-tryptase linked promoters.....                                                                    | <b>4</b>  |
| <b>Fig. S3.</b> Multiple sequence alignment of cloned duplicated and wild-type alpha-tryptase promoters.....                                   | <b>6</b>  |
| <b>Fig. S4.</b> Alpha-tryptase isoform-specific promoter assay.....                                                                            | <b>7</b>  |
| <b>Fig. S5.</b> Unidentified and C>T associated wild-type alpha-tryptase promoters do not affect basal serum tryptase.....                     | <b>8</b>  |
| <b>Fig. S6.</b> Log-transformed modeling of BST by <i>TPSAB1</i> copy number.....                                                              | <b>9</b>  |
| <b>Table S1.</b> Tryptase haplotype sequences.....                                                                                             | <b>10</b> |
| <b>Table S2.</b> Alpha-tryptase sequences and corresponding reference assemblies.....                                                          | <b>11</b> |
| <b>Table S3.</b> 39-bp tryptase consensus sequences.....                                                                                       | <b>12</b> |
| <b>Table S4.</b> Tryptase primer/probe sequences.....                                                                                          | <b>13</b> |
| <b>Table S5.</b> Percentage of healthy individuals expressing specific $\alpha$ - and $\beta$ -tryptase isoforms                               | <b>14</b> |
| <b>Table S6.</b> Candidate variants of undetermined significance identified in patients with BST >11.4ng/mL who did not have H $\alpha$ T..... | <b>15</b> |

# SUPPLEMENTAL METHODS

## Trypsase isoform re-alignment script

```
import pysam
import glob
import pandas as pd
import argparse

parser = argparse.ArgumentParser(description='Create a CSV file for further processing')
parser.add_argument('--bam_folder', type=str, nargs=1, required=True,
                    help='The directory containing the bam files.')
parser.add_argument('--source', type=str, nargs=1, required=True,
                    help='The source of the bam files e.g. AML')
parser.add_argument('--roi_start', type=int, nargs=1, required=True,
                    help='The 0 based start position of ROI')
parser.add_argument('--roi_end', type=int, nargs=1, required=True,
                    help='The 0 based end position of ROI')
parser.add_argument('--output_name', type=str, nargs=1, required=True,
                    help='The name of the output file')
args = parser.parse_args()

print (args)

def get_files(directory_path):
    """
    Return a list containing all the files matching a pattern in \
    the given directory
    """
    print ('{directory_path}/*.sorted.bam'.format(
        directory_path=directory_path))
    file_list = glob.glob('{directory_path}/*.sorted.bam'.format(
        directory_path=directory_path))

    return file_list

def get_read_count(df):
    """
    Get the read count in a specific bam file.
    """
    return int(pysam.view("-c", df['file_location']))

def get_transcript_count(df, transcript_name):
    """
    Return the count of the transcript i.e how many of each of \
    the three transcripts are in there.
    Note - Does not look at the quality of the alignment.
    """
    sam_file_location = df['file_location']
    samfile = pysam.AlignmentFile(sam_file_location, "rb")
    count = 0
    for read in samfile:
        if read is not None and read.reference_name == transcript_name:
            count = count + 1
    return count

def get_zero_edit_distance_count(df, transcript_name):
    """
    For a given transcript e.g. Alpha_GEX_64k_HEX get how many of \
    the matches have an NM tag of zero
    i.e. the match was exact.
    """
    sam_file_location = df['file_location']
    samfile = pysam.AlignmentFile(sam_file_location, "rb")
    count = 0
    for read in samfile:
        if read is not None and read.reference_name == transcript_name:
            edit_distance = read.get_tag('NM')
            if edit_distance == 0:
                count = count + 1
    return count

def get_transcript_read_count_filtered(df, transcript_name, start, end):
    """
    Count hits which cover the bit of the reference we are interested in.
    start = 0 based position in reference the alignment must start on or before.
    end = 0 based position that the alignment must end on or before.
    """
    sam_file_location = df['file_location']
    samfile = pysam.AlignmentFile(sam_file_location, "rb")
    iter = samfile.fetch(transcript_name, start, end)
    count = 0
    for read in iter:
        if read.reference_start <= start and read.reference_end >= end:
            count = count + 1
    return count

def get_transcript_read_count_filtered_exact(df, transcript_name, start, end):
    """
    Count hits which cover the bit of the reference we are interested in \
    and which are exact.
    That is - do they cross position 0 - 44 of the transcript \
    (given by transcript_name) and \
    have an edit distance from the reference of 0.
    start = 0 based position in reference the alignment must start on or before.
    end = 0 based position that the alignment must end on or before.
    """
    sam_file_location = df['file_location']
    samfile = pysam.AlignmentFile(sam_file_location, "rb")
    iter = samfile.fetch(transcript_name, start, end)
    count = 0
    for read in iter:
        if read.reference_start <= start and read.reference_end >= end:
            edit_distance = read.get_tag('NM')
            if edit_distance == 0:
                count = count + 1
    return count

results = get_files(args.bam_folder[0])
file_names = [x.split('/')[len(x.split('/))-1] for x in results]
#Create Dataframe
df = pd.DataFrame(index=file_names)
df['file_location'] = results
df['source'] = args.source[0]

#Add total-count column
df['alignment_count'] = df.apply(get_read_count, axis=1)
print ('Added total alignment count')

#Count the number of reads aligned to each reference transcript
df['alpha_wt_count'] = df.apply(get_transcript_count, axis=1, args=['Alpha_GEX_64k_HEX'])
df['alpha_dup_count'] = df.apply(get_transcript_count, axis=1, args=['Alpha_GEX_79k_dup_FAM'])
df['beta_count'] = df.apply(get_transcript_count, axis=1, args=['BETA_new_GEX_FAM'])
print ('Added alignment count for each transcript')

#Number of exact read alignments for each reference transcript
df['alpha_wt_zero_edit_count'] = df.apply(get_zero_edit_distance_count, axis=1, args=['Alpha_GEX_64k_HEX'])
df['alpha_dup_zero_edit_count'] = df.apply(get_zero_edit_distance_count, axis=1, args=['Alpha_GEX_79k_dup_FAM'])
df['beta_zero_edit_count'] = df.apply(get_zero_edit_distance_count, axis=1, args=['BETA_new_GEX_FAM'])
print ('Added exact alignment count for each transcript')

# Number of alignments that span our area of interest
start = args.roi_start[0]
end = args.roi_end[0]

df['alpha_read_covers_snps_count'] = df.apply(get_transcript_read_count_filtered,
        axis=1,
        args=['Alpha_GEX_64k_HEX', start, end])
df['alpha_dup_read_covers_snps_count'] = df.apply(get_transcript_read_count_filtered,
        axis=1,
        args=['Alpha_GEX_79k_dup_FAM', start, end])
df['beta_read_covers_snps_count'] = df.apply(get_transcript_read_count_filtered,
        axis=1,
        args=['BETA_new_GEX_FAM', start, end])
print ('Added alignment count for each transcript within ROI')

# Number of alignments that span our area of interest and are exact
df['alpha_read_covers_snps_count_exact'] = df.apply(get_transcript_read_count_filtered_exact,
        axis=1,
        args=['Alpha_GEX_64k_HEX', start, end])
df['alpha_dup_read_covers_snps_count_exact'] = df.apply(get_transcript_read_count_filtered_exact,
        axis=1,
        args=['Alpha_GEX_79k_dup_FAM', start, end])
df['beta_read_covers_snps_count_exact'] = df.apply(get_transcript_read_count_filtered_exact,
        axis=1,
        args=['BETA_new_GEX_FAM', start, end])

print ('Added exact alignment count for each transcript within ROI')

df.to_csv(args.output_name[0])
print ('Created CSV')
```

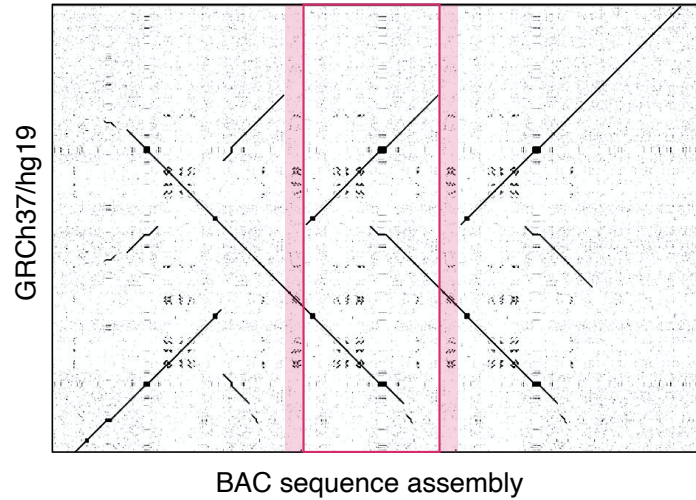

**Figure S1. Alignment of the tryptase locus in hereditary alpha tryptasemia.** Dot-plot of the assembled tryptase locus from an individual with a *TPSAB1* duplication (BAC clone assembly, X-axis) with the human reference sequence GRCh37/hg19 chr16:1,270,000-1,315,000 (Y-axis).

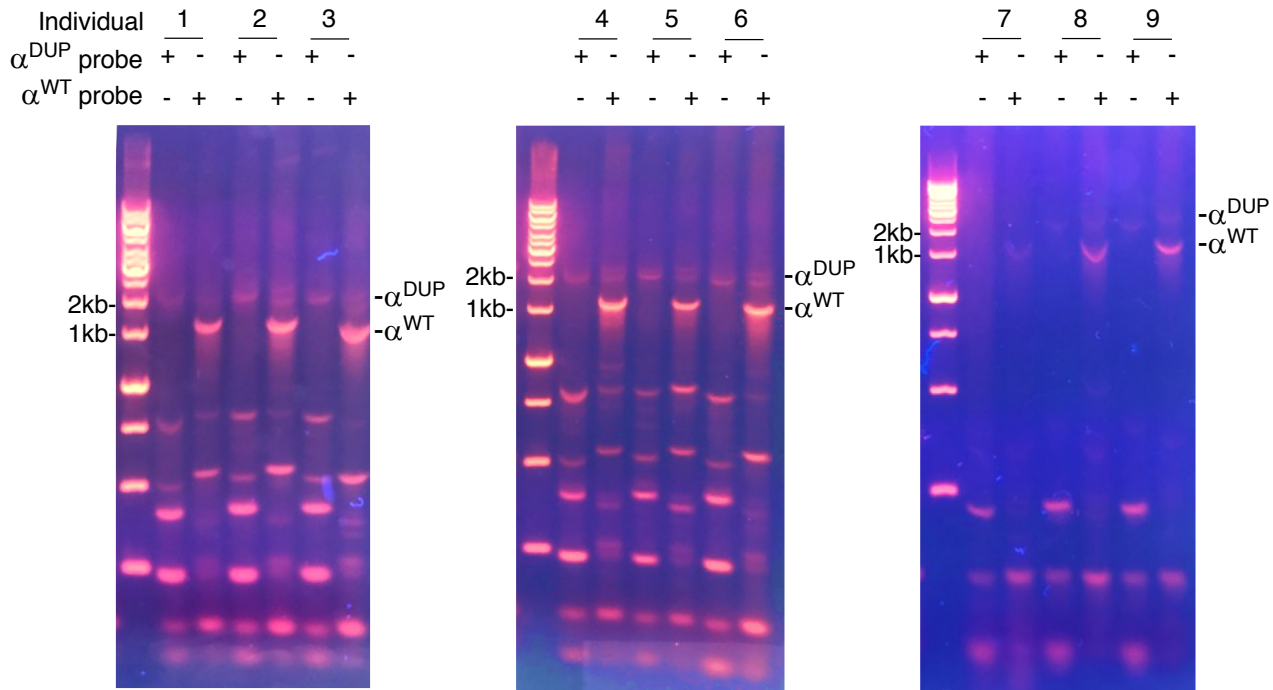

**Figure S2. Gel electrophoresis of alpha-tryptase linked promoters.** Genomic DNA from nine individuals with hereditary alpha tryptasemia was amplified with duplicated ( $\alpha^{\text{DUP}}$ ) and wild-type alpha-tryptase ( $\alpha^{\text{WT}}$ ) specific forward primers paired with an alpha-tryptase specific reverse primer. The largest molecular weight bands of approximately 1 and 2 kilobases (kB) respectively correspond to the full-length proximal coding sequences and linked promoters.

CLUSTAL O(1.2.4) multiple sequence alignment

```

aDUP_CACCT_BAC      GGGGCCGGGGGTGAGACCATGGGGAGCTGGGCTGGGGGTGAGACCATGGGGAGC 60
aDUP_CACCT_CLONE8  GGGGCCGGGGGTGAGACCATGGGGAGCTGGGCTGGGGGTGAGACCATGGGGAGC 60
aWT_GGTTT_BAC      GGGGCCGGGGATGAGACCATGGGGAGCTGGG----- 0
aWT_GGTTT_CLONE5  GGGGCCGGGGATGAGACCATGGGGAGCTGGG----- 0
*****

aDUP_CACCT_BAC      TGGGGCCGGGGGTGGGACTAGTCCATGGGGAGCTGGGCTGGGGGTGAGACCAT 120
aDUP_CACCT_CLONE8  TGGGGCCGGGGGTGGGACTAGTCCATGGGGAGCTGGGCTGGGGGTGAGACCAT 120
aWT_GGTTT_BAC      ----- 0
aWT_GGTTT_CLONE5  ----- 0

aDUP_CACCT_BAC      GGGGAGCTGGGCTGGGGCTGGGACTAGTCCATGGGGAGCTGGGCTGGGGGTGAG 180
aDUP_CACCT_CLONE8  GGGGAGCTGGGCTGGGGCTGGGACTAGTCCATGGGGAGCTGGGCTGGGGGTGAG 180
aWT_GGTTT_BAC      ----- 0
aWT_GGTTT_CLONE5  ----- 0

aDUP_CACCT_BAC      ACCATGGGGAGCTGGGGCCGGGGGTGGGACTAGTCCATGGGGAGCTGGGCTGGG 240
aDUP_CACCT_CLONE8  ACCATGGGGAGCTGGGGCCGGGGGTGGGACTAGTCCATGGGGAGCTGGGCTGGG 240
aWT_GGTTT_BAC      ----- 0
aWT_GGTTT_CLONE5  ----- 0

aDUP_CACCT_BAC      GGGTGAGACCATGGGGAGCTGGGCTGGGGCTGGGACTAGTCCATGGGGAGCTGG 300
aDUP_CACCT_CLONE8  GGGTGAGACCATGGGGAGCTGGGCTGGGGCTGGGACTAGTCCATGGGGAGCTGG 300
aWT_GGTTT_BAC      ----- 0
aWT_GGTTT_CLONE5  ----- 0

aDUP_CACCT_BAC      GACCATGGGGAGCTGGGGCCGGGGGTGCGACTAGTCCATGGGGAGCTGGGCTGG 360
aDUP_CACCT_CLONE8  GACCATGGGGAGCTGGGGCCGGGGGTGCGACTAGTCCATGGGGAGCTGGGCTGG 360
aWT_GGTTT_BAC      ----- 0
aWT_GGTTT_CLONE5  ----- 0

aDUP_CACCT_BAC      GGGTGAGTCCATGGGGAGCTGGGCTGGGGCTGGGGGTGAGACCATGGGGAGCTGG 420
aDUP_CACCT_CLONE8  GGGTGAGTCCATGGGGAGCTGGGCTGGGGCTGGGGGTGAGACCATGGGGAGCTGG 420
aWT_GGTTT_BAC      ----- 0
aWT_GGTTT_CLONE5  ----- 0

aDUP_CACCT_BAC      GGGCTGGGGGTGAGACCATGGGGAGCTGGGGCCGGGGGTGGGACTAGTCCATGG 480
aDUP_CACCT_CLONE8  GGGCTGGGGGTGAGACCATGGGGAGCTGGGGCCGGGGGTGGGACTAGTCCATGG 480
aWT_GGTTT_BAC      ----- 0
aWT_GGTTT_CLONE5  ----- 0

aDUP_CACCT_BAC      TGGGCTGGGGCTGGGGGTGAGACCATGGGGAGCTGGGCTGGGGCTGGGACTAGT 540
aDUP_CACCT_CLONE8  TGGGCTGGGGCTGGGGGTGAGACCATGGGGAGCTGGG----- 517
aWT_GGTTT_BAC      ----- 31
aWT_GGTTT_CLONE5  ----- 31

aDUP_CACCT_BAC      GGAGCTGGGCTGGAGCTGGGGGTGAGACCATGGGGAGCTGGGGCCGGGGGTGCG 600
aDUP_CACCT_CLONE8  ----- 517
aWT_GGTTT_BAC      -----G----- 32
aWT_GGTTT_CLONE5  -----G----- 32

aDUP_CACCT_BAC      TCCATGGGGAGCTGGGCTGGGGGTGGGCTGGGCTGGGCTGGGCTGGGCTGGG 660
aDUP_CACCT_CLONE8  -----CTGGGGCTGGG 528
aWT_GGTTT_BAC      -----CTGGGGCTGG 42
aWT_GGTTT_CLONE5  -----CTGGGGCTGG 42
***** **

aDUP_CACCT_BAC      GGTGAGTCCATGGGGAGCTGGGGCTGGGGCTGGGACTAGTCCATGGGGAGCTGG 720
aDUP_CACCT_CLONE8  GGTGAGTCCATGGGGAGCTG----- 548
aWT_GGTTT_BAC      GACTAGTCCATGGGGAGCTGG----- 63
aWT_GGTTT_CLONE5  GACTAGTCCATGGGGAGCTGG----- 63
* . *****

aDUP_CACCT_BAC      GCTGGGGGTGAGTCCATGGGGAGCTGGGCTGGGGGTGGGCTGGGCTGGGCTGG 780
aDUP_CACCT_CLONE8  -----G----- 549
aWT_GGTTT_BAC      -----G----- 64
aWT_GGTTT_CLONE5  -----G----- 64
*

aDUP_CACCT_BAC      GCTGGGGTTGGGGGTGAGTCCATGGGGAGCTGGGCTGGGCTGGGCTGGGCTGG 840
aDUP_CACCT_CLONE8  GCTGGGGTTGGGGGTGAGTCCATGGGGAGCTGGGCTGGGCTGGGCTGGGCTGG 609
aWT_GGTTT_BAC      GCTGAAGTTGGGGGTGAGTCCATGGGGAGCTGGGCTGGGCTGGGCTGGGCTGG 124
aWT_GGTTT_CLONE5  GCTGAAGTTGGGGGTGAGTCCATGGGGAGCTGGGCTGGGCTGGGCTGGGCTGG 124
**** . *****

aDUP_CACCT_BAC      CTCTGTCTGCCCTTCCCTCTGCCGATGAAGCTCAGATCCCATGATAAGGAGGCA 900
aDUP_CACCT_CLONE8  CTCTGTCTGCCCTTCCCTCTGCCGATGAAGCTCAGATCCCATGATAAGGAGGCA 669
aWT_GGTTT_BAC      CTCTCTCTGTCTTCCCTCTGCCGATGAAGCTCAGATCCCATGATAAGGAGGCA 184
aWT_GGTTT_CLONE5  CTCTCTCTGTCTTCCCTCTGCCGATGAAGCTCAGATCCCATGATAAGGAGGCA 184
**** *

aDUP_CACCT_BAC      AGACCAGGGGTCTGCACGGACAGCCCCAGAGGTGGACATTGAGGACTCGTAGGAG 960
aDUP_CACCT_CLONE8  AGACCAGGGGTCTGCACGGACAGCCCCAGAGGTGGACATTGAGGACTCGTAGGAG 729
aWT_GGTTT_BAC      AGACCAGGGGACTGCACGGACAGCCCCAGAGGTGGACATTGAGGACTCGTAGGAG 244
aWT_GGTTT_CLONE5  AGACCAGGGGACTGCACGGACAGCCCCAGAGGTGGACATTGAGGACTCGTAGGAG 244
*****

aDUP_CACCT_BAC      TGGGTCTCATACGGGGGTGGGGAGCAGGGCCCTTCTGGCTGAGGACACTTGGTCT 1020
aDUP_CACCT_CLONE8  TGGGTCTCATACGGGGGTGGGGAGCAGGGCCCTTCTGGCTGAGGACACTTGGTCT 789
aWT_GGTTT_BAC      TGGGTCTCATACGGGGGTGGGGAGCAGGGCCCTTCTGGCTGAGGACACTTGGTCT 304
aWT_GGTTT_CLONE5  TGGGTCTCATACGGGGGTGGGGAGCAGGGCCCTTCTGGCTGAGGACACTTGGTCT 304
*****

aDUP_CACCT_BAC      TCCCTCTCAAGGCTGTTTCCCATCTGACAAGGGGTCTCATGTGAGCCFCCACCA 1080
aDUP_CACCT_CLONE8  TCCCTCTCAAGGCTGTTTCCCATCTGACAAGGGGTCTCATGTGAGCCFCCACCA 849
aWT_GGTTT_BAC      TCCCTCTCAAGGCTGTTTCCCATCTGACAAGGGGTCTCATGTGAGCCFCCACCA 364
aWT_GGTTT_CLONE5  TCCCTCTCAAGGCTGTTTCCCATCTGACAAGGGGTCTCATGTGAGCCFCCACCA 364
*****

```

|                   |                                                               |      |
|-------------------|---------------------------------------------------------------|------|
| aDUP_CACCT_BAC    | TGAGTCGAGGAGGGCTGGCCACCCCGTGGATTCCGGAGTCCGTAAGAGGGGTGTCCAC    | 1140 |
| aDUP_CACCT_CLONE8 | TGAGTCGAGGAGGGCTGGCCACCCCGTGGATTCCGGAGTCCGTAAGAGGGGTGTCCAC    | 909  |
| aWT_GGTTT_BAC     | TGAGTCGAGGAGGGCTGGCCACCCCGTGGATTCCGGAGTCCGTAAGAGGGGTGTCCAC    | 424  |
| aWT_GGTTT_CLONE5  | TGAGTCGAGGAGGGCTGGCCACCCCGTGGATTCCGGAGTCCGTAAGAGGGGTGTCCAC    | 424  |
| *****             |                                                               |      |
| aDUP_CACCT_BAC    | CGTCATGTCCCAACCCCGTGGGCACCTTCCCGTCTCTTGGAGCGTGGCCATGGACATGA   | 1200 |
| aDUP_CACCT_CLONE8 | CGTCATGTCCCAACCCCGTGGGCACCTTCCCGTCTCTTGGAGCGTGGCCATGGACATGA   | 969  |
| aWT_GGTTT_BAC     | CGTCATGTCCCAACCCCGTGGGCACCTTCCCGTCTCTTGGAGCGTGGCCATGGACATGA   | 484  |
| aWT_GGTTT_CLONE5  | CGTCATGTCCCAACCCCGTGGGCACCTTCCCGTCTCTTGGAGCGTGGCCATGGACATGA   | 484  |
| *****             |                                                               |      |
| aDUP_CACCT_BAC    | GTTCTCACCCCGTGTCCCTCTTGGGAAACAGGTTTCAGGAGCGATGGGTCTTGTAGCC    | 1260 |
| aDUP_CACCT_CLONE8 | GTTCTCACCCCGTGTCCCTCTTGGGAAACAGGTTTCAGGAGCGATGGGTCTTGTAGCC    | 1029 |
| aWT_GGTTT_BAC     | GTTCTCAC-CCGTGTCCCTCTTGGGAAACAGGTTTCAGGAGCGACGGGTCTTGTAGCC    | 543  |
| aWT_GGTTT_CLONE5  | GTTCTCAC-CCGTGTCCCTCTTGGGAAACAGGTTTCAGGAGCGACGGGTCTTGTAGCC    | 543  |
| *****             |                                                               |      |
| aDUP_CACCT_BAC    | TGGGACAGCCAGGCCACCTGGGTGCAGCAATGCCTGAAGGCCCTCTTGGCAGGACAGG    | 1320 |
| aDUP_CACCT_CLONE8 | TGGGACAGCCAGGCCACCTGGGTGCAGCAATGCCTGAAGGCCCTCTTGGCAGGACAGG    | 1089 |
| aWT_GGTTT_BAC     | TGGGACAGCCAGGCCACCTGGGTGCAGCAATGCCTGAAGGCCCTCTTGGCAGGACAGG    | 603  |
| aWT_GGTTT_CLONE5  | TGGGACAGCCAGGCCACCTGGGTGCAGCAATGCCTGAAGGCCCTCTTGGCAGGACAGG    | 603  |
| *****             |                                                               |      |
| aDUP_CACCT_BAC    | GGCAGGAGCAGATCCCACAGCGGGAAGTGGTGGGTCCAGTGCCTGGATCCACCAGCT     | 1380 |
| aDUP_CACCT_CLONE8 | GGCAGGAGCAGATCCCACAGCGGGAAGTGGTGGGTCCAGTGCCTGGATCCACCAGCT     | 1149 |
| aWT_GGTTT_BAC     | GGCAGGAGCAGATCCCACAGCGGGAAGTGGTGGGTCCAGTGCCTGGATCCACCAGCT     | 663  |
| aWT_GGTTT_CLONE5  | GGCAGGAGCAGATCCCACAGCGGGAAGTGGTGGGTCCAGTGCCTGGATCCACCAGCT     | 663  |
| *****             |                                                               |      |
| aDUP_CACCT_BAC    | GACAGGTGGAGCTGCCAGTCTCCAGTGTCTCAGCCCTCAGCGGGGGCTGCCTGGCAGCCCC | 1440 |
| aDUP_CACCT_CLONE8 | GACAGGTGGAGCTGCCAGTCTCCAGTGTCTCAGCCCTCAGCGGGGGCTGCCTGGCAGCCCC | 1209 |
| aWT_GGTTT_BAC     | GACAGGTGGAGCTGCCAGCCTCCAGTGTCTCAGCCCTCAGCGGGGGCTGCCTGGCAGCCCC | 723  |
| aWT_GGTTT_CLONE5  | GACAGGTGGAGCTGCCAGCCTCCAGTGTCTCAGCCCTCAGCGGGGGCTGCCTGGCAGCCCC | 723  |
| *****             |                                                               |      |
| aDUP_CACCT_BAC    | ACACACAGAGGGCATCGGGGTGGCGGGGACAGTGTACACGGGGGCCCTGGGTCTGAGT    | 1500 |
| aDUP_CACCT_CLONE8 | ACACACAGAGGGCATCGGGGTGGCGGGGACAGTGTACACGGGGGCCCTGGGTCTGAGT    | 1269 |
| aWT_GGTTT_BAC     | ACACACAGAGGGCATCGGGGTGGCGGGGACAGTGTACACGGGGGCCCTGGGTCTGAGT    | 783  |
| aWT_GGTTT_CLONE5  | ACACACAGAGGGCATCGGGGTGGCGGGGACAGTGTACACGGGGGCCCTGGGTCTGAGT    | 783  |
| *****             |                                                               |      |
| aDUP_CACCT_BAC    | CATCCACTTCTCCGAGTCTGGATGGGAGGACCCAGCGCCCTCTCCGCCCTCTCTGA      | 1560 |
| aDUP_CACCT_CLONE8 | CATCCACTTCTCCGAGTCTGGATGGGAGGACCCAGCGCCCTCTCTCCGCCCTCTCTGA    | 1329 |
| aWT_GGTTT_BAC     | CATCCACTTCTCCGAGTCTGGATGGGAGGACCCAGCGCCCTCTCTCCGCCCTCTCTGA    | 843  |
| aWT_GGTTT_CLONE5  | CATCCACTTCTCCGAGTCTGGATGGGAGGACCCAGCGCCCTCTCTCCGCCCTCTCTGA    | 843  |
| *****             |                                                               |      |
| aDUP_CACCT_BAC    | TCTGGAAGCATAAATGGGGAGGGGAGAGCCCACTGGGTAGAGGAACAGGGAGCGGGCAG   | 1620 |
| aDUP_CACCT_CLONE8 | TCTGGAAGCATAAATGGGGAGGGGAGAGCCCACTGGGTAGAGGAACAGGGAGCGGGCAG   | 1389 |
| aWT_GGTTT_BAC     | TCTGGAAGGATAAATGGGGAGGGGAGAGCCCGCTGGGTAGAGGAACAGGGAGTGGCCAG   | 903  |
| aWT_GGTTT_CLONE5  | TCTGGAAGGATAAATGGGGAGGGGAGAGCCCGCTGGGTAGAGGAACAGGGAGTGGCCAG   | 903  |
| *****             |                                                               |      |
| aDUP_CACCT_BAC    | GGTAAGTCCCCTCTCAGAGACCCTGACATCAGCGTCACTGGAGCAGAGTGGCCACGC     | 1680 |
| aDUP_CACCT_CLONE8 | GGTAAGTCCCCTCTCAGAGACCCTGACATCAGCGTCACTGGAGCAGAGTGGCCACGC     | 1449 |
| aWT_GGTTT_BAC     | GGTAAGTCCCCTACTCTCAGAGACCCTGACATCAGCGTCACTGGAGCAGAGTGGCCACGC  | 963  |
| aWT_GGTTT_CLONE5  | GGTAAGTCCCCTACTCCAGAGACCCTGACATCAGCGTCACTGGAGCAGAGTGGCCACGC   | 963  |
| *****             |                                                               |      |
| aDUP_CACCT_BAC    | CTCAGACTCAGAGCACCAGACCCAGGCCCTGCAGCCCTGGACCCACCCCGGTCCCCCGT   | 1740 |
| aDUP_CACCT_CLONE8 | CTCAGACTCAGAGCACCAGACCCAGGCCCTGCAGCCCTGGACCCACCCCGGTCCCCCGT   | 1509 |
| aWT_GGTTT_BAC     | CTCAGACTCAGAGCACCAGACCCAGGCCCTGCAGCCCTGGACCCACCCCGGTCCCCCGT   | 1023 |
| aWT_GGTTT_CLONE5  | CTCAGACTCAGAGCACCAGACCCAGGCCCTGCAGCCCTGGACCCACCCCGGTCCCCCGT   | 1023 |
| *****             |                                                               |      |
| aDUP_CACCT_BAC    | CCAGCTCCATTCTTCCACCCACAATCTGTAGCCCCAGCCCTGCCTGTGAGGCCGGC      | 1800 |
| aDUP_CACCT_CLONE8 | CCAGCTCCATTCTTCCACCCACAATCTGTAGCCCCAGCCCTGCCTGTGAGGCCGGC      | 1569 |
| aWT_GGTTT_BAC     | CCAGCTCCATTCTTCCACCCACAATCTGTAGCCCCAGCCCTGCCTGTGAGGCCGGC      | 1083 |
| aWT_GGTTT_CLONE5  | CCAGCTCCATTCTTCCACCCACAATCTGTAGCCCCAGCCCTGCCTGTGAGGCCGGC      | 1083 |
| *****             |                                                               |      |
| aDUP_CACCT_BAC    | CAGGCCACGATGCTCCTCTTGTCTCCACAGATG                             | 1834 |
| aDUP_CACCT_CLONE8 | CAGGCCACGATGCTC-----                                          | 1585 |
| aWT_GGTTT_BAC     | CAGGCCACGATGCTCCTCTTGTCTCCACAGATG                             | 1117 |
| aWT_GGTTT_CLONE5  | CAGGCCACGATGCTC-----                                          | 1100 |
| *****             |                                                               |      |

**Figure S3. Multiple sequence alignment of representative cloned duplicated and wild-type  $\alpha$ -tryptase promoters.**

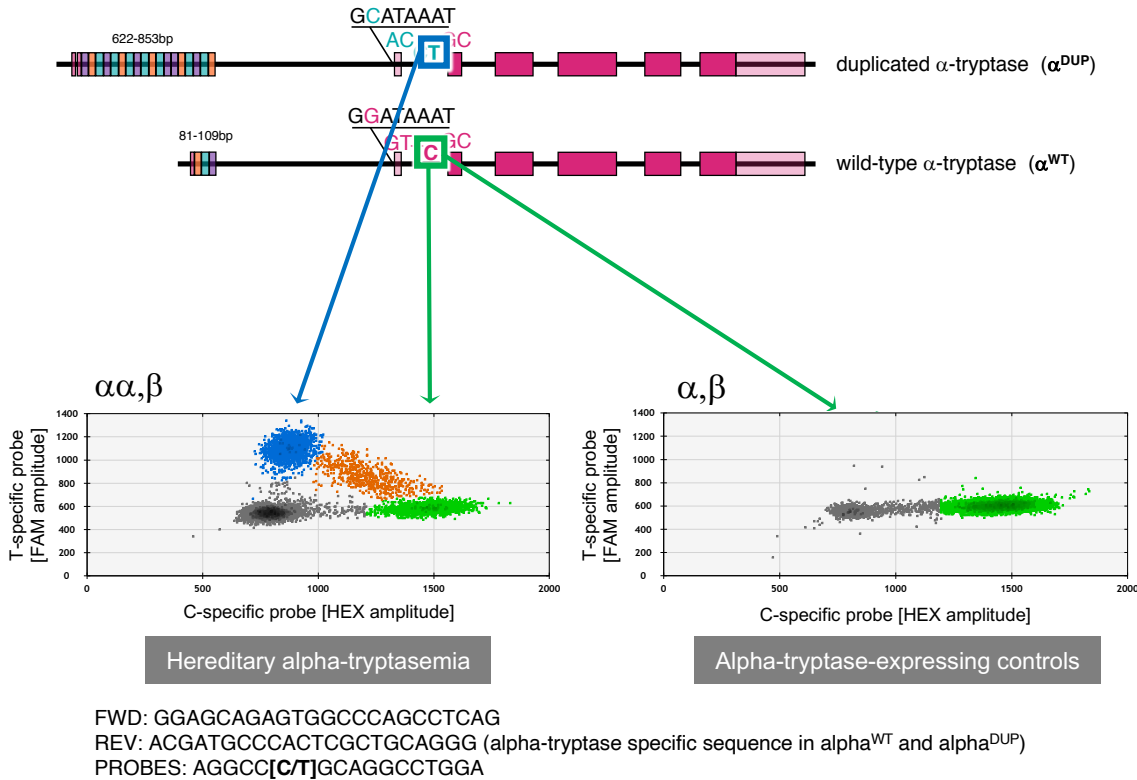

**Figure S4. Alpha-tryptase isoform-specific promoter assay.** (Top) Schematic of the two alpha-tryptase isoforms present at *TPSAB1* in a patient with hereditary alpha tryptasemia. In order to identify alleles containing the expanded promoter in linkage with duplicated alpha-tryptase ( $\alpha^{DUP}$ ) in other samples, a reverse primer was designed to hybridize only to alpha-tryptase sequences, while the sequence complementary to the forward primer were present at all tryptase isoforms. Two probes were then designed and multiplexed in order to compete with one another to detect the single base pair change C>T, with the latter being present 5' of the first coding exon of  $\alpha^{DUP}$  (primer/probe sequences at bottom). When only  $\alpha^{WT}$  was present, fluorescence was detected in only one channel (HEX) corresponding to the C-containing sequence (green, right middle). Whereas when  $\alpha^{DUP}$  was present both a C-linked to  $\alpha^{WT}$  as well as the C>T were detected (blue, FAM, left middle). Orange data-points are droplets containing both  $\alpha^{WT}$  (C-specific, HEX) and  $\alpha^{DUP}$  (T-specific, FAM) variants.

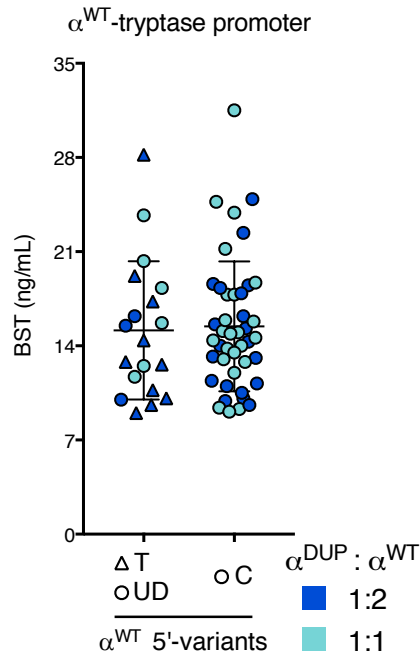

**Figure S5. Unidentified and C>T associated wild-type alpha-tryptase promoters do not affect basal serum tryptase.** Basal serum tryptase (BST) levels in patients with hereditary alpha tryptasemia separated by the promoter variant identified in linkage with wild-type alpha ( $\alpha^{WT}$ ) on the allele harboring a duplication. While all  $\alpha^{WT}$  sequences on non-duplicated alleles are linked to the major allele, some  $\alpha^{WT}$  sequences on alleles with increased *TPSAB1* copy number were not. Individuals with the common major allele C are shown on the right, and individuals with undefined (UD, circles) or the minor allele T (triangles) are shown on the left. The ratio of duplicated alpha-tryptase ( $\alpha^{DUP}$ ) to  $\alpha^{WT}$  copy is indicated in blue (1:2) or cyan (1:1). Mann-Whitney.



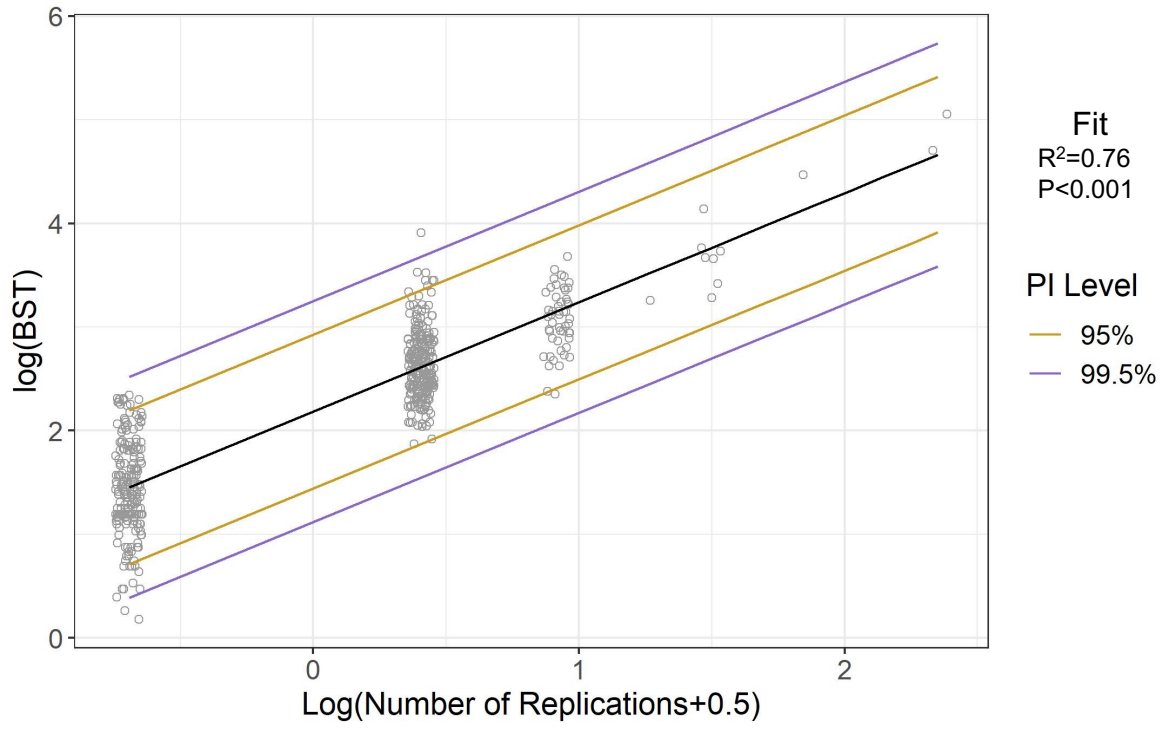

**Figure S6. Log-transformed modeling of BST by *TPSAB1* copy number.**

**Table S1. Tryptase haplotype sequences.**

---

|       |                                                                                                                                                                                                        |
|-------|--------------------------------------------------------------------------------------------------------------------------------------------------------------------------------------------------------|
| CACCT | CATAAATGGGGAGGGGAGAGCCC <b>A</b> CTGGGTAGAAGGAACA<br>GGGAG <b>C</b> GGCCAGGGTAAGTCCC <b>C</b> ACTCTCAGAGACCCTGA<br>CATCAGCGTCACCTGGAGCAGAGTGGCC <b>C</b> AGCCTCAGACT<br>CAGAGCACCAAGACCCAGGCC <b>T</b> |
| GGTTC | GATAAATGGGGAGGGGAGAGCCC <b>G</b> CTGGGTAGAAGGAACA<br>GGGAG <b>T</b> GGCCAGGGTAAGTCCC <b>T</b> ACTCTCAGAGACCCTGA<br>CATCAGCGTCACCTGGAGCAGAGTGGCC <b>C</b> AGCCTCAGACT<br>CAGAGCACCAAGACCCAGGCC <b>C</b> |
| GACCC | GATAAATGGGGAGGGGAGAGCCC <b>A</b> CTGGGTAGAAGGAACA<br>GGGAG <b>C</b> GGCCAGGGTAAGTCCC <b>C</b> ACTCTCAGAGACCCTGA<br>CATCAGCGTCACCTGGAGCAGAGTGGCC <b>C</b> AGCCTCAGACT<br>CAGAGCACCAAGACCCAGGCC <b>C</b> |
| GACCT | GATAAATGGGGAGGGGAGAGCCC <b>A</b> CTGGGTAGAAGGAACA<br>GGGAG <b>C</b> GGCCAGGGTAAGTCCC <b>C</b> ACTCTCAGAGACCCTGA<br>CATCAGCGTCACCTGGAGCAGAGTGGCC <b>C</b> AGCCTCAGACT<br>CAGAGCACCAAGACCCAGGCC <b>T</b> |

---

**Table S2. 39-bp tryptase consensus sequences.**

---

|                      |                                                                       |
|----------------------|-----------------------------------------------------------------------|
| alpha <sup>WT</sup>  | CCC <u>G</u> CTGGGTAGAAAGGAACAGGGAG <u>T</u> GGCCAGGATGCTGA <u>GC</u> |
| alpha <sup>DUP</sup> | CCC <u>A</u> CTGGGTAGAAAGGAACAGGGAG <u>C</u> GGCCAGGATGCTGA <u>GC</u> |
| beta                 | CCC <u>A</u> CTGGGTAGAAAGGAACAGGGAG <u>C</u> GGCCAGGATGCTGA <u>AT</u> |

---

blue – 5' UTR; black – first coding exon; red isoform-defining variants.

**Table S3. Tryptase primer/probe sequences.**

---

|                        |                                                                                  |
|------------------------|----------------------------------------------------------------------------------|
| alpha <sup>TOTAL</sup> | FWD: TGCTGCTGGCGCTGC<br>REV: GACTCTCAGGCTCACCTGC<br>PROBE: CTGCAGCAAGCGGGTATCGTC |
| alpha <sup>WT</sup>    | FWD: CCCGCTGGGTAGAAGGAAC<br>REV: GACGATACCCGCTTGCTG<br>PROBE: TGGCCAGGATGCTGAGC  |
| alpha <sup>DUP</sup>   | FWD: CCCACTGGGTAGAAGGAAC<br>REV: GACGATACCCGCTTGCTG<br>PROBE: CGGCCAGGATGCTGAGC  |
| beta                   | FWD: CCCACTGGGTAGAAGGAAC<br>REV: AACGATGCCCACTCGCTG<br>PROBE: CGGCCAGGATGCTGAAT  |

---

**Table S4. Alpha-tryptase sequences and corresponding reference assemblies.**

| Position<br>(relative to TSS)                                                                                | -30      | -8       | 36 | 44,45 | 177 | 309 | 333 | 508 | 644 | 647 | 657 | 661 |
|--------------------------------------------------------------------------------------------------------------|----------|----------|----|-------|-----|-----|-----|-----|-----|-----|-----|-----|
| Alpha1; M30038.1;<br>CHM1; alpha <sup>WT</sup>                                                               | G        | T        | G  | GC    | C   | A   | A   | C   | G   | A   | C   | A   |
| Alpha2; AF206665.1;<br>BC051852.1;<br>BC028059.1;<br>LT733899.1;<br>KJ892311.1;<br>DQ894235.2;<br>AY893004.1 | G        | T        | G  | CG    | T   | G   | A   | C   | C   | G   | A   | C   |
| AC238650.2;<br>AF098328.1;<br>AF206666.1;<br>BC028059.1;<br>BC051852.1;<br>GM243385; NA12878                 | G        | T        | C  | CG    | T   | G   | A   | C   | C   | G   | A   | C   |
| FJ931116.1                                                                                                   | G        | T        | G  | CG    | C   | G   | C   | T   | G   | A   | C   | A   |
| AC240106.3                                                                                                   | G        | T        | C  | CG    | T   | G   | A   | C   | G   | A   | C   | A   |
| alpha <sup>DUP</sup>                                                                                         | <b>A</b> | <b>C</b> | G  | GC    | C   | A   | A   | C   | G   | A   | C   | A   |

```
>Alpha1
cccgcctgggtagaaggaacagggagtgccaggATGCTGAGCCTGCTGCTGCTGGCGCTGCCCGTCCTGGCGAGCCGCGCC
TACGCGGCCCTGCCCCAGTCCAGGCCCTGCAGCAAGCGGGTATCGTCGGGGGTCAGGAGGCCCCAGGAGCAAGTGGCCC
TGGCAGGTGAGCCTGAGAGTCCCGCACCAGATACTGGATGCACTTCTGCGGGGGCTCCCTCATCCACCCCAAGTGGGTGCTG
ACCGCGGCGCACTGCCTGGGACCGGACGTCAAGGATCTGGCCACCCTCAGGGTGCAACTGCGGGAGCAGCACCTCTACTAC
CAGGACCAGCTGCTGCCAGTCAGCAGGATCATCGTGCACCCACAGTTCTACATCATCCAGACTGGAGCGGATATCGCCCTG
CTGGAGCTGGAGGAGCCCGTGAACATCTCCAGCCGCGTCCACACGGTTCATGCTGCCCCCTGCCTCGGAGACCTTCCCCCG
GGGATGCCGTGCTGGGTCACTGGCTGGGGCGATGTGGACAATGATGAGCCCTCCACCGCCATTTCCCTGAAGCAGGTG
AAGGTCCCATTAATGGAAAACCACATTTGTGACGCAAAATACCACCTTGGCGCCTACACGGGAGACGACGTCCGCATCATC
CGTGACGACATGCTGTGTGCCGGGAACAGCCAGAGGGACTCCTGCAAGGGCGACTCTGGAGGGCCCTGGTGTGCAAGGTG
AATGGCACCTGGCTACAGGGGGCGTGGTTCAGCTGGGACGAGGGCTGTGCCAGCCCAACCGGCTGGCATCTACACCCGT
GTCACCTACTACTTGGACTGGATCCACCACTATGTCCCCAAAAAGCCGTGA
```

**Table S5. Percentage of healthy individuals expressing specific  $\alpha$ - and  $\beta$ -tryptase isoforms.**

| Transcript     | Haplotype   | Sample number<br>(n = 4160) | % Total     | % Tryptase positive |
|----------------|-------------|-----------------------------|-------------|---------------------|
| any tryptase   | -           | 863                         | 20.7%       | 100%                |
| any $\alpha$   | ACAT        | 741                         | 17.8%       | 85.9%               |
| any $\beta$    | NNGC        | 314                         | 7.5%        | 36.4%               |
| $\alpha^{DUP}$ | <b>ACGC</b> | <b>25</b>                   | <b>0.6%</b> | <b>2.9%</b>         |
| $\alpha^{WT}$  | GTGC        | 289                         | 7.2%        | 33.5%               |

Data are from combined from 58 publicly available datasets; red – prevalence of hereditary alpha-tryptasemia

**Table S6. Candidate variants of undetermined significance identified in patients with BST >11.4ng/mL who did not have H $\alpha$ T.**

| Patient        | Gene          | Chr | Start     | End       | Ref  | Var                     | AA change  | PBMC       | BMGran     | BMMC       |
|----------------|---------------|-----|-----------|-----------|------|-------------------------|------------|------------|------------|------------|
| 1              | <i>TET2</i>   | 4   | 105234636 | 105234636 | C    | T                       | p.Q232X    | 0.018923   | 0.2238426  | 0.1432696  |
| 1*             | <i>FADS6</i>  | 17  | 74893497  | 74893497  | C    | CGGTTCCATG<br>GGCTCCGTA | p.P33fs7X  | 0.027044   | 0.1444073  | 0.1624679  |
| 1              | <i>GRB14</i>  | 2   | 164508777 | 164508777 | G    | GT                      | p.H297fs1X | 0          | 0.18850502 | 0.04259754 |
| 2              | <i>KMT2C</i>  | 7   | 152247975 | 152247975 | G    | A                       | p.T820I    | 0.05543634 | 0.0711392  | 0.22914893 |
| 2*             | <i>FADS6</i>  | 17  | 74893497  | 74893497  | C    | CGGTTCCATG<br>GGCTCCGTA | p.P33fs7X  | 0          | 0.1610098  | 0.08378218 |
| 2              | <i>KMT5A</i>  | 12  | 123390764 | 123390764 | C    | T                       | p.R49W     | 0.02342595 | 0.06664452 | 0.26906613 |
| 2              | <i>MSH3</i>   | 5   | 80654896  | 80654896  | G    | C                       | p.A57P     | 0.07519636 | 0.1615971  | 0.62264769 |
| 3              | <i>MAP2K1</i> | 15  | 66491063  | 66491063  | A    | C                       | 3'UTR      | 0          | 0.16156567 | 0.06649085 |
| 3              | <i>MAP2K1</i> | 15  | 66491059  | 66491059  | G    | C                       | 3'UTR      | 0          | 0.16472012 | 0.07177007 |
| 3              | <i>MAP2K1</i> | 15  | 66491055  | 66491055  | G    | T                       | 3'UTR      | 0          | 0.16472012 | 0.05015322 |
| 4              | <i>NOTCH2</i> | 1   | 120069404 | 120069404 | C    | T                       | p.M1?      | 0.14917127 | 0.20416667 | 0.20916334 |
| 4              | <i>RPL10</i>  | X   | 154400837 | 154400837 | C    | T                       | p.R210W    | 0          | 0.14081633 | 0.14257028 |
| 5 <sup>†</sup> | <i>RUNX1</i>  | 21  | 34792308  | 34792308  | A    | G                       | p.S424P    | 0.26548673 | 0.19277108 | 0.17142857 |
| 5 <sup>†</sup> | <i>CEBPA</i>  | 19  | 33301848  | 33301848  | GGGC | G                       | p.P189del  | 0.09615385 | 0.01497006 | 0.02076125 |

Chr - chromosome; Ref - reference; Var - variant; AA - amino acid; PBMC - peripheral blood mononuclear cell; BMGran - bone marrow granulocytes; BMMC - bone marrow mononuclear cells; \*indicated a shared insertion present in patient 1 and 3; <sup>†</sup>identified variants were germline; patient 4 had idiopathic hypereosinophilic syndrome.
